# Supplementary material for: An OGT-STAT5 Axis in Regulatory T Cells Controls Energy and Iron Metabolism
Source: PubMed Central journal article supplement (PMC9304952; doi:10.3389/fimmu.2022.874863), 2022-07-08
Supplement: Image_1.pdf [file Image_1.pdf]

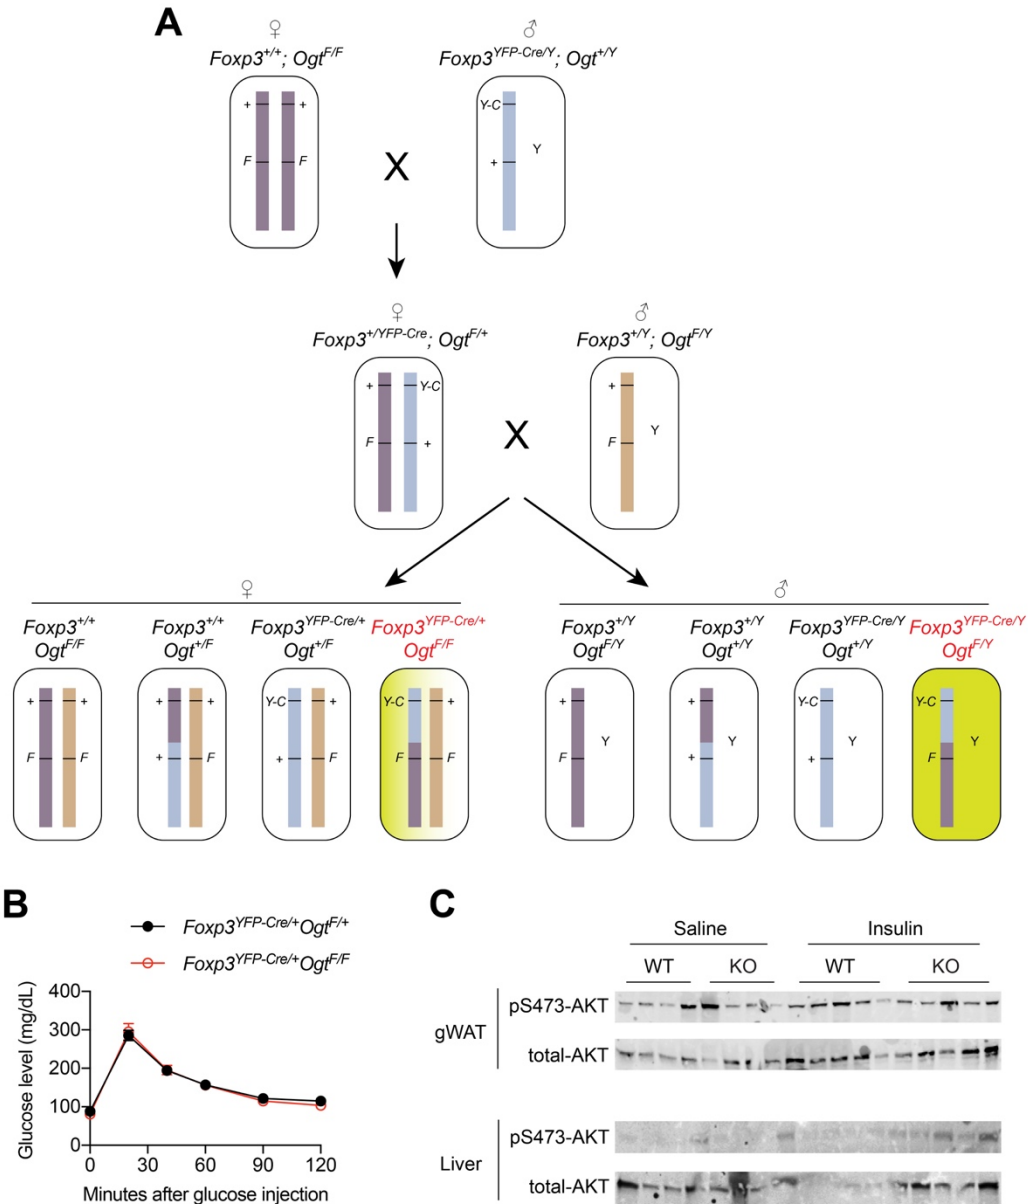

**Figure S1. Related to Figure 1.**

(A) Schematic diagram showing mating strategy to generate Treg cell-specific OGT knockout mice.

(B) Glucose tolerance test of 3-month-old, NC-fed *Foxp3<sup>YFP-Cre/wt</sup>Ogt<sup>F/+</sup>* (n = 18) and *Foxp3<sup>YFP-Cre/wt</sup>Ogt<sup>F/F</sup>* (n = 15) female mice.

(C) pS473-Akt and total-Akt immunoblotting of gonadal WAT and liver protein lysates from *Foxp3<sup>YFP-Cre/wt</sup>Ogt<sup>F/+</sup>* and *Foxp3<sup>YFP-Cre/wt</sup>Ogt<sup>F/F</sup>* female mice treated with saline or insulin for 30 min.
